# Supplementary material
Source: PubMed Central journal article supplement (PMC2975750)
Supplement: NIHMS246313-supplement-2_si_002.pdf [file NIHMS246313-supplement-2_si_002.pdf]

# Coordination-Driven Self-Assembly of Truncated Tetrahedra Capable of Encapsulating 1,3,5-Triphenylbenzene

Yao-Rong Zheng,<sup>†</sup> Zhigang Zhao,<sup>†</sup> Hyunuk Kim,<sup>‡</sup> Ming Wang,<sup>†</sup> Koushik Ghosh,<sup>†</sup> J. Bryant

Pollock,<sup>†</sup> Ki-Whan Chi,<sup>‡</sup> and Peter J. Stang<sup>\*†</sup>

*<sup>†</sup>Department of Chemistry, University of Utah, 315 South 1400 East, RM 2020, Salt*

*Lake City, Utah 84112, and*

*<sup>‡</sup>Department of Chemistry, University of Ulsan, Ulsan 680-749, Republic of Korea.*

E-mail: stang@chem.utah.edu

## Table of Contents

|                                                                                                                    |     |
|--------------------------------------------------------------------------------------------------------------------|-----|
| Experimental Details for the Synthesis and Characterization of Truncated Tetrahedra <b>3a</b> and <b>3b</b> .....  | S2  |
| X-Ray Crystallographic Data of Truncated Tetrahedron <b>3a</b> .....                                               | S4  |
| Pulsed Field Gradient Spin Echo NMR Measurements of Truncated Tetrahedra <b>3a</b> and <b>3b</b> .....             | S32 |
| Experimental Details for the Synthesis and Characterization of the Encapsulated Complex <b>3b</b> · <b>4</b> ..... | S33 |

**Methods and Materials.** 90° organoplatinum acceptor **1**<sup>1</sup> and hexapyridyl donor **2**<sup>2</sup> were prepared according to literature procedures. Deuterated acetone, nitromethane, and water were purchased from Cambridge Isotope Laboratory (Andover, MA). NMR spectra were recorded on a Varian Unity 300 spectrometer, and pulsed field gradient spin echo (PGSE) NMR data were obtained on an Inova 500 MHz spectrometer. The <sup>1</sup>H NMR chemical shifts are reported relative to residual solvent signals, and <sup>31</sup>P NMR resonances are referenced to an external unlocked sample of 85% H<sub>3</sub>PO<sub>4</sub> (δ 0.0). Mass spectra were recorded on a Micromass Quattro II triple-quadrupole mass spectrometer using electrospray ionization (ESI) with a MassLynx operating system. Element analysis was performed by Atlantic Microlab (Norcross, GA).

**Truncated Tetrahedron 3a.** 90° organoplatinum acceptor **1a** (5.87 mg, 8.05 mmol) and hexapyridyl donor **2** (2.65 mg, 2.66 mmol) were placed in a 2-dram vial followed by addition of 1.0 mL CD<sub>3</sub>NO<sub>2</sub>/Acetone-*d*<sub>6</sub> (v/v 7/3) solvent. The mixture was stirred at 80 °C for 16 h, and the truncated tetrahedron **3a** was formed. The solvent was then removed by evaporation under N<sub>2</sub> flow and vacuum. 0.8 ml Acetone was added to the mixture to dissolve the self-assembly. The OTf<sup>-</sup> counterions were exchanged for PF<sub>6</sub><sup>-</sup> using an aqueous solution of KPF<sub>6</sub> to precipitate the product, which was collected and washed with excess water and then dried in vacuum. Yield: 93 %. <sup>1</sup>H NMR (CD<sub>3</sub>NO<sub>2</sub>/Acetone-*d*<sub>6</sub>: 7/3, 300 MHz): δ 8.91 (m, 48H, H<sub>α-Py</sub>), 7.58 (d, *J*<sub>1</sub> = 5.1 Hz, 24H, H<sub>β-Py</sub>), 7.44 (d, *J*<sub>1</sub> = 5.1 Hz, 24H, H<sub>β-Py</sub>), 7.14 (dd, *J*<sub>1</sub> = 7.8 Hz, *J*<sub>2</sub> = 33.9 Hz, 48H, PhH<sub>exterior</sub>), 6.94 (dd, *J*<sub>1</sub> = 6.0 Hz, *J*<sub>2</sub> = 6.3 Hz, 48H, PhH<sub>interior</sub>), 2.10 (m, 144H, PCH<sub>2</sub>CH<sub>3</sub>), 1.29 (m, 216H, PCH<sub>2</sub>CH<sub>3</sub>). <sup>31</sup>P{<sup>1</sup>H} NMR (CD<sub>3</sub>NO<sub>2</sub>/Acetone-*d*<sub>6</sub>: 7/3, 121.4 MHz): δ 0.92 (s, <sup>1</sup>*J*<sub>Pt-P</sub> = 3121 Hz). Anal. Calcd for C<sub>432</sub>H<sub>552</sub>F<sub>144</sub>N<sub>24</sub>P<sub>48</sub>Pt<sub>12</sub>: C, 41.03; H, 4.40; N, 2.66. Found: C, 40.80; H, 4.50; N, 2.65.

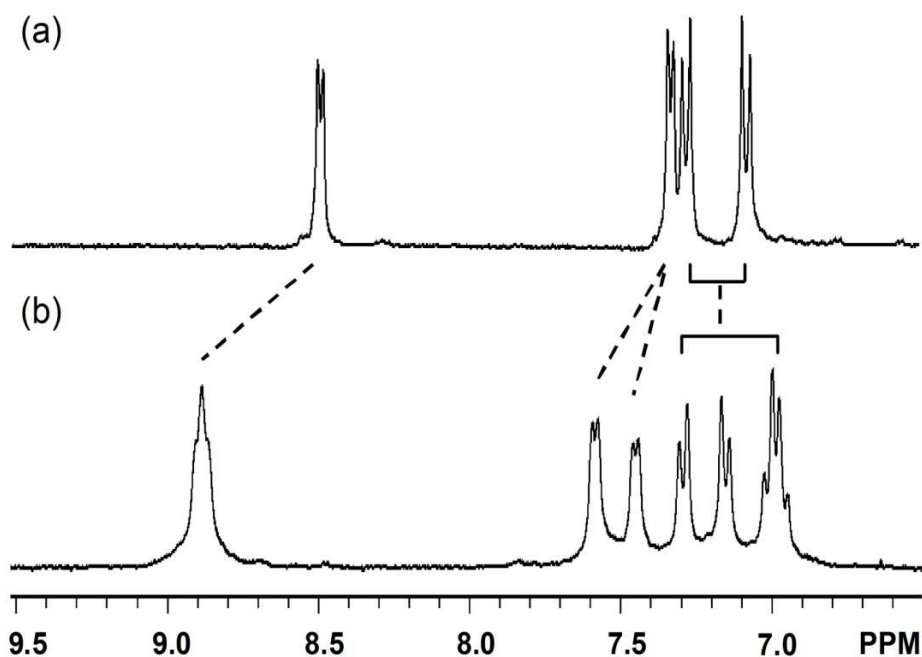

Figure S1. Partial <sup>1</sup>H NMR (300MHz) spectra of hexapyridyl ligand **2** (a) and truncated tetrahedron **3a** (b).

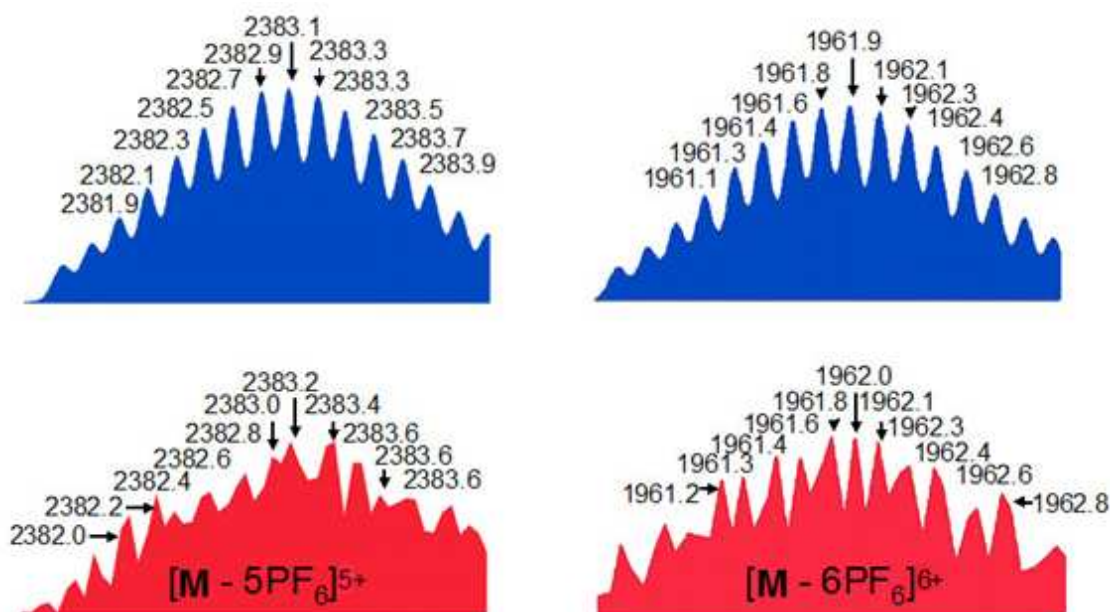

Figure S2. Calculated (top) and Experimental (bottom) ESI mass spectra of **3a**.

**Truncated Tetrahedron 3b.**  $90^\circ$  organoplatinum acceptor **1b** (3.57 mg, 5.53 mmol) and hexapyridyl donor **2** (1.83 mg, 1.84 mmol) were placed in a 2-dram vial followed by addition of 1.0 mL  $D_2O$ /Acetone- $d_6$  ( $v/v$  1/1) solvent. The mixture was stirred at  $80^\circ C$  for 16 h, and the truncated tetrahedron **3b** was formed. The OTf<sup>-</sup> counterions were exchanged for  $PF_6^-$  using an aqueous solution of  $KPF_6$  to precipitate the product, which was collected and washed with excess water and then dried in vacuum. Yield: 91 %.  $^1H$  NMR ( $D_2O$ /Acetone- $d_6$ : 1/1, 300 MHz):  $\delta$  8.68 (m, 48H,  $H_{\alpha-Py}$ ), 7.48 (m, 48H,  $H_{\beta-Py}$ ), 7.03 (dd,  $J_1 = 7.8$  Hz,  $J_2 = 37.2$  Hz, 48H,  $PhH_{exterior}$ ), 6.78 (m, 48H,  $PhH_{interior}$ ), 1.81 (d,  $J = 10.8$  Hz, 216H,  $PCH_3$ ).  $^{31}P\{^1H\}$  NMR ( $D_2O$ /Acetone- $d_6$ : 1/1, 121.4 MHz):  $\delta$  -28.2 ppm (s,  $^1J_{Pt-P} = 3110$  Hz). Anal. Calcd for  $C_{360}H_{408}F_{144}N_{24}P_{48}Pt_{12}$ : C, 37.16; H, 3.53; N, 2.89. Found: C, 37.53; H, 3.80; N, 2.82.

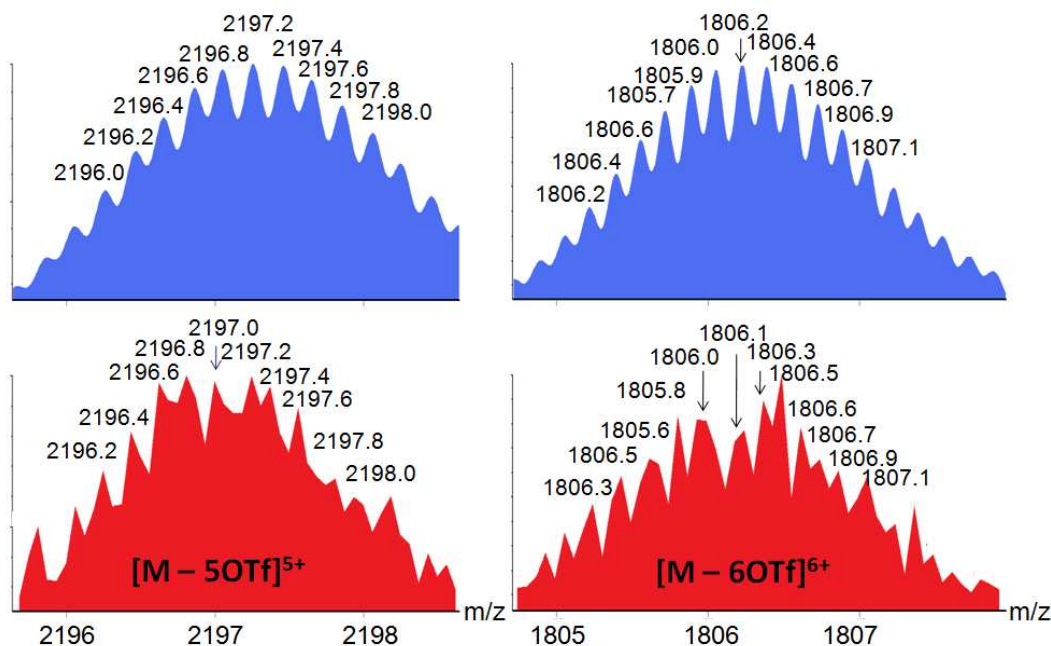

Figure S3. Calculated (top) and Experimental (bottom) ESI mass spectra of **3b**.

### X-Ray Crystallographic Data of Truncated Tetrahedron **3a**

The diffraction data from single crystals of **3a** mounted on a loop were collected at 90 K on an ADSC Quantum 210 CCD diffractometer with a synchrotron radiation ( $\lambda = 0.90000 \text{ \AA}$ ) at Macromolecular Crystallography Beamline 6B1, Pohang Accelerator Laboratory (PAL), Pohang, Korea. The raw data were processed and scaled using the program HKL2000. The structure was solved by direct methods, and the refinements were carried out with full-matrix least-squares on  $F^2$  with appropriate softwares implemented in SHELXTL program package. X-ray data for **3a**:  $C_{108}H_{138}F_{36}N_6P_{12}Pt_3$ ,  $M = 3161.15$ , tetragonal,  $P-42_1c$  (No. 114),  $a = 32.987(5) \text{ \AA}$ ,  $c = 31.918(6) \text{ \AA}$ ,  $V = 34730(10) \text{ \AA}^3$ ,  $Z = 8$ ,  $T = 90 \text{ K}$ ,  $\mu(\text{synchrotron}) = 4.137 \text{ mm}^{-1}$ ,  $d_{calc} = 1.209 \text{ g}\cdot\text{cm}^{-3}$ , 154346 reflections measured, 23131 unique ( $R_{int} = 0.0674$ ),  $R_I = 0.0841$ ,  $wR_2 = 0.2244$  for 19314 reflections ( $I > 2\sigma(I)$ ),  $R_I = 0.0981$ ,  $wR_2 = 0.2396$  (all data), GoF = 1.060, Flack = 0.015(6), 1487 parameters and 3157 restraints. All the non-hydrogen atoms were refined anisotropically. Hydrogen atoms were added to their geometrically ideal positions.

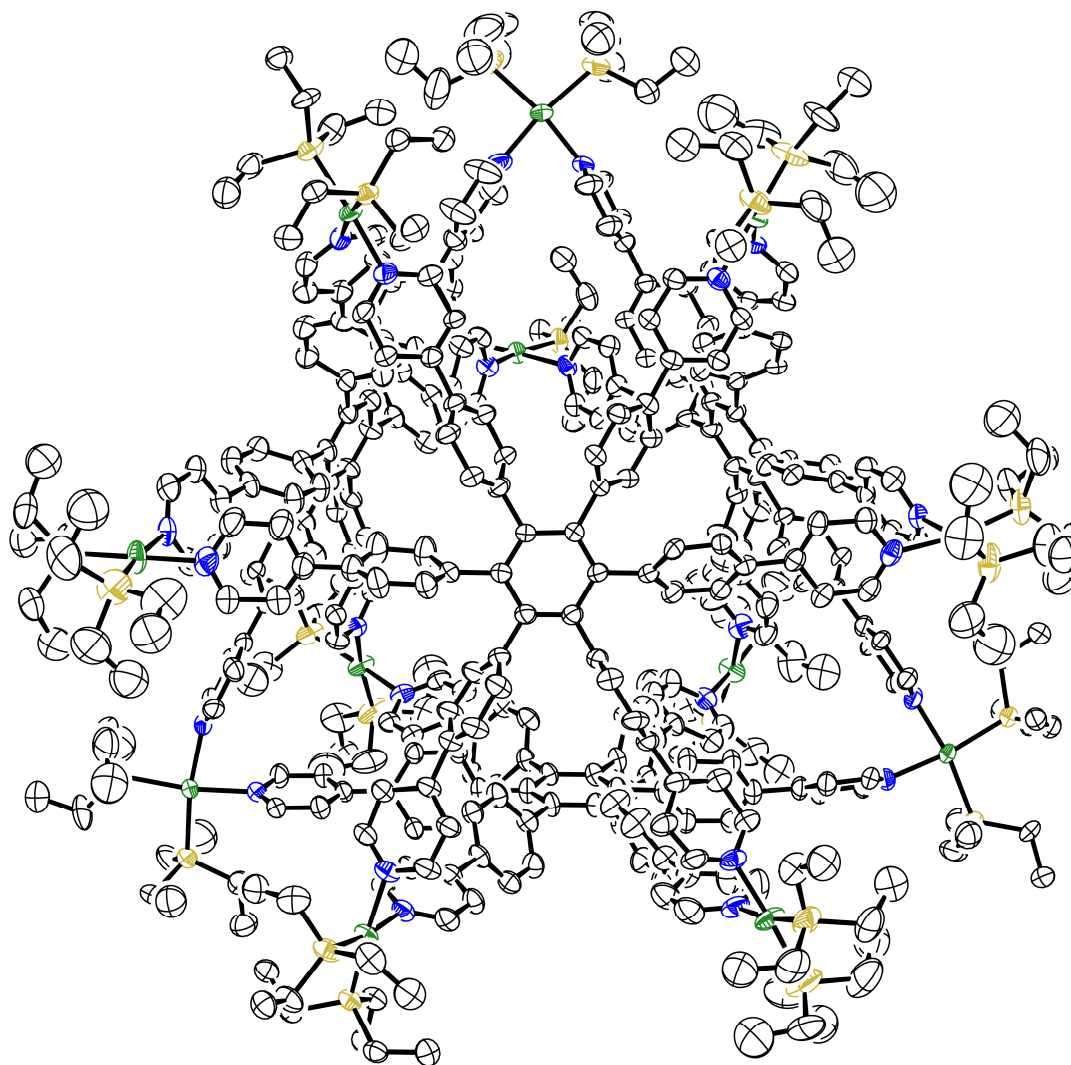

Figure S4. X-ray crystal structure of **3a** with 30 % probability.

Table S1. Crystal data and structure refinement for **3a**.

|                                              |                                                                 |                     |
|----------------------------------------------|-----------------------------------------------------------------|---------------------|
| Identification code                          | <b>3a</b>                                                       |                     |
| Empirical formula                            | C108 H138 F36 N6 P12 Pt3                                        |                     |
| Formula weight                               | 3161.15                                                         |                     |
| Temperature                                  | 90(2) K                                                         |                     |
| Wavelength                                   | 0.90000 Å                                                       |                     |
| Crystal system                               | Tetragonal                                                      |                     |
| Space group                                  | <i>P</i> -42 <sub>1</sub> / <i>c</i>                            |                     |
| Unit cell dimensions                         | <i>a</i> = 32.987(5) Å                                          | $\alpha = 90^\circ$ |
|                                              | <i>b</i> = 32.987(5) Å                                          | $\beta = 90^\circ$  |
|                                              | <i>c</i> = 31.918(6) Å                                          | $\gamma = 90^\circ$ |
| Volume                                       | 34730(10) Å <sup>3</sup>                                        |                     |
| Z                                            | 8                                                               |                     |
| Density (calculated)                         | 1.209 g/cm <sup>3</sup>                                         |                     |
| Absorption coefficient                       | 4.137 mm <sup>-1</sup>                                          |                     |
| F(000)                                       | 12528                                                           |                     |
| Crystal size                                 | 0.42 × 0.42 × 0.38 mm <sup>3</sup>                              |                     |
| Theta range for data collection              | 1.56 to 30.37°                                                  |                     |
| Index ranges                                 | -36 ≤ <i>h</i> ≤ 36, -36 ≤ <i>k</i> ≤ 37, -32 ≤ <i>l</i> ≤ 32   |                     |
| Reflections collected                        | 154346                                                          |                     |
| Independent reflections                      | 23131 [ <i>R</i> <sub>int</sub> = 0.0674]                       |                     |
| Completeness to theta = 25.00°               | 99.0 %                                                          |                     |
| Absorption correction                        | Semi-empirical from equivalents                                 |                     |
| Max. and min. transmission                   | 0.3024 and 0.2754                                               |                     |
| Refinement method                            | Full-matrix least-squares on F <sup>2</sup>                     |                     |
| Data / restraints / parameters               | 23131 / 3157 / 1487                                             |                     |
| Goodness-of-fit on F <sup>2</sup>            | 1.050                                                           |                     |
| Final R indices [ <i>I</i> > 2σ( <i>I</i> )] | <i>R</i> <sub>1</sub> = 0.0841, <i>wR</i> <sub>2</sub> = 0.2244 |                     |
| R indices (all data)                         | <i>R</i> <sub>1</sub> = 0.0981, <i>wR</i> <sub>2</sub> = 0.2396 |                     |
| Absolute structure parameter                 | 0.015(6)                                                        |                     |
| Extinction coefficient                       | 0.00123(6)                                                      |                     |
| Largest diff. peak and hole                  | 2.491 and -1.069 e.Å <sup>-3</sup>                              |                     |

Table S2. Atomic coordinates ( $\times 10^4$ ) and equivalent isotropic displacement parameters ( $\text{\AA}^2 \times 10^3$ ) for **3a**.  $U(\text{eq})$  is defined as one third of the trace of the orthogonalized  $U^{ij}$  tensor.

|       | x        | y        | z        | $U(\text{eq})$ |
|-------|----------|----------|----------|----------------|
| Pt(1) | -1800(1) | -2495(1) | -3546(1) | 71(1)          |
| Pt(2) | -3351(1) | -4668(1) | -1095(1) | 88(1)          |
| Pt(3) | -8958(1) | -3661(1) | -3679(1) | 101(1)         |
| N(1)  | -3713(4) | -4363(3) | -1538(3) | 72(2)          |
| N(2)  | -8352(3) | -3483(4) | -3629(4) | 86(3)          |
| N(3)  | -2418(3) | -2576(4) | -3559(3) | 79(2)          |
| N(4)  | -7101(4) | -1836(3) | -5943(3) | 76(3)          |
| N(5)  | -6538(3) | -4853(3) | -1504(4) | 81(3)          |
| N(6)  | -3980(5) | -1290(4) | -5820(5) | 103(4)         |
| C(1)  | -4663(4) | -4040(4) | -2745(4) | 72(3)          |
| C(2)  | -4425(4) | -3814(4) | -2469(4) | 72(3)          |
| C(3)  | -4170(4) | -4003(4) | -2146(4) | 68(3)          |
| C(4)  | -4435(4) | -3390(4) | -2516(4) | 73(3)          |
| C(5)  | -4893(4) | -3863(4) | -3059(4) | 76(3)          |
| C(6)  | -4894(4) | -3451(4) | -3092(4) | 70(3)          |
| C(7)  | -4674(4) | -3213(4) | -2826(4) | 73(3)          |
| C(8)  | -5152(4) | -3244(4) | -3421(4) | 73(3)          |
| C(9)  | -5705(4) | -3490(4) | -2700(4) | 68(3)          |
| C(10) | -5762(3) | -3570(5) | -3117(4) | 72(3)          |
| C(11) | -6070(4) | -4093(4) | -2485(4) | 67(3)          |
| C(12) | -6220(4) | -4338(4) | -2140(4) | 69(3)          |
| C(13) | -6135(4) | -4174(5) | -2887(4) | 80(3)          |
| C(14) | -5971(4) | -3926(5) | -3210(5) | 86(3)          |
| C(15) | -5560(3) | -3318(4) | -3440(4) | 68(3)          |
| C(16) | -4971(4) | -3001(4) | -3736(4) | 74(3)          |
| C(17) | -3766(4) | -3935(5) | -2123(4) | 79(3)          |
| C(18) | -4110(5) | -4439(5) | -1554(4) | 84(3)          |
| C(19) | -4349(4) | -4255(4) | -1860(4) | 76(3)          |
| C(20) | -3549(4) | -4116(4) | -1803(4) | 72(3)          |
| C(21) | -5859(4) | -2673(4) | -4379(4) | 75(3)          |
| C(22) | -5193(4) | -2813(4) | -4043(4) | 73(3)          |

|       |          |          |          |        |
|-------|----------|----------|----------|--------|
| C(23) | -5799(4) | -3120(4) | -3762(4) | 69(3)  |
| C(24) | -4485(7) | -2423(6) | -4883(6) | 122(6) |
| C(25) | -4590(5) | -2018(5) | -4926(5) | 89(4)  |
| C(26) | -4849(6) | -1873(5) | -4632(5) | 108(5) |
| C(27) | -5047(6) | -2131(5) | -4353(5) | 94(4)  |
| C(28) | -4991(4) | -2531(4) | -4351(4) | 71(3)  |
| C(29) | -4697(6) | -2692(6) | -4615(6) | 115(5) |
| C(30) | -4513(4) | -2929(5) | -3728(4) | 74(3)  |
| C(31) | -4245(4) | -3256(5) | -3743(4) | 81(3)  |
| C(32) | -4376(4) | -2527(5) | -3661(5) | 88(3)  |
| C(33) | -3949(4) | -2461(5) | -3639(4) | 82(3)  |
| C(34) | -3835(4) | -3187(5) | -3700(4) | 79(3)  |
| C(35) | -3690(4) | -2788(5) | -3656(4) | 75(3)  |
| C(36) | -5615(4) | -2881(4) | -4054(4) | 70(3)  |
| C(37) | -6242(4) | -3181(5) | -3772(4) | 72(3)  |
| C(38) | -6841(4) | -3548(6) | -3948(5) | 93(4)  |
| C(39) | -6427(4) | -3507(5) | -3964(5) | 90(4)  |
| C(40) | -6909(4) | -2942(5) | -3534(5) | 85(3)  |
| C(41) | -7086(4) | -3266(5) | -3738(4) | 79(3)  |
| C(42) | -7527(4) | -3333(5) | -3697(4) | 82(3)  |
| C(43) | -6037(4) | -4377(4) | -1771(4) | 74(3)  |
| C(44) | -6594(5) | -4569(5) | -2190(5) | 88(3)  |
| C(45) | -7658(4) | -3713(6) | -3536(5) | 97(4)  |
| C(46) | -8093(5) | -3770(6) | -3495(6) | 105(4) |
| C(47) | -8210(4) | -3127(6) | -3755(5) | 98(4)  |
| C(48) | -2651(4) | -2334(5) | -3790(5) | 84(3)  |
| C(49) | -3240(4) | -2718(4) | -3608(4) | 71(3)  |
| C(50) | -3016(4) | -2952(5) | -3362(4) | 73(3)  |
| C(51) | -6712(4) | -1894(4) | -6030(4) | 77(3)  |
| C(52) | -7247(5) | -1899(5) | -5568(4) | 86(4)  |
| C(53) | -6435(5) | -2027(5) | -5734(5) | 84(3)  |
| C(54) | -6603(4) | -2123(4) | -5320(4) | 78(3)  |
| C(55) | -6324(4) | -2289(5) | -4995(5) | 83(3)  |
| C(56) | -6197(4) | -4626(4) | -1455(4) | 78(3)  |
| C(57) | -6487(4) | -2892(5) | -3545(5) | 84(3)  |
| C(58) | -7820(4) | -3033(5) | -3819(5) | 93(4)  |
| C(59) | -2586(4) | -2874(5) | -3338(5) | 80(3)  |
| C(60) | -4387(5) | -1777(6) | -5232(6) | 99(4)  |

|        |           |           |           |         |
|--------|-----------|-----------|-----------|---------|
| C(61)  | -3990(7)  | -1668(7)  | -5170(6)  | 122(5)  |
| C(62)  | -5845(5)  | -2803(6)  | -4787(5)  | 96(4)   |
| C(63)  | -6113(5)  | -2332(5)  | -4278(5)  | 90(4)   |
| C(64)  | -7002(5)  | -2032(5)  | -5244(4)  | 85(3)   |
| C(65)  | -6062(5)  | -2607(5)  | -5096(5)  | 93(4)   |
| C(66)  | -5845(4)  | -3733(4)  | -2380(4)  | 63(2)   |
| C(67)  | -3078(4)  | -2399(5)  | -3829(5)  | 85(4)   |
| C(68)  | -6726(4)  | -4810(4)  | -1862(5)  | 82(3)   |
| C(69)  | -6351(5)  | -2150(5)  | -4582(5)  | 88(4)   |
| C(70)  | -4357(7)  | -1370(9)  | -5858(9)  | 158(8)  |
| C(71)  | -4560(8)  | -1604(9)  | -5523(8)  | 162(8)  |
| C(72)  | -3779(7)  | -1442(7)  | -5480(6)  | 123(5)  |
| P(1)   | -1115(1)  | -2486(1)  | -3628(1)  | 87(1)   |
| C(1P)  | -938(6)   | -2995(4)  | -3675(6)  | 119(5)  |
| C(2P)  | -996(7)   | -3252(6)  | -3286(6)  | 123(5)  |
| C(3P)  | -1001(5)  | -2230(6)  | -4124(5)  | 115(4)  |
| C(4P)  | -1196(7)  | -1813(6)  | -4191(7)  | 132(6)  |
| C(5P)  | -792(3)   | -2244(6)  | -3256(5)  | 97(4)   |
| C(6P)  | -343(4)   | -2274(6)  | -3345(5)  | 96(4)   |
| P(2)   | -1859(1)  | -2061(1)  | -2994(1)  | 73(1)   |
| C(7P)  | -2385(3)  | -2005(5)  | -2821(4)  | 85(3)   |
| C(8P)  | -2444(5)  | -1712(5)  | -2458(5)  | 97(4)   |
| C(9P)  | -1719(4)  | -1544(3)  | -3121(4)  | 80(3)   |
| C(10P) | -1981(5)  | -1336(5)  | -3449(5)  | 101(4)  |
| C(11P) | -1579(4)  | -2207(4)  | -2535(4)  | 82(3)   |
| C(12P) | -1688(5)  | -2640(4)  | -2395(5)  | 83(3)   |
| P(3)   | -3355(2)  | -4108(1)  | -676(2)   | 110(2)  |
| C(13P) | -3656(6)  | -4220(9)  | -213(5)   | 151(6)  |
| C(14P) | -4100(7)  | -4322(11) | -311(11)  | 199(9)  |
| C(15P) | -3614(8)  | -3680(5)  | -915(5)   | 129(6)  |
| C(16P) | -3726(7)  | -3321(5)  | -644(6)   | 124(5)  |
| C(17P) | -2888(5)  | -3907(6)  | -486(6)   | 124(5)  |
| P(4)   | -2964(2)  | -5072(2)  | -682(2)   | 137(2)  |
| C(19P) | -2601(8)  | -5323(10) | -1018(8)  | 191(7)  |
| C(18P) | -2660(8)  | -3736(9)  | -859(8)   | 164(8)  |
| C(20P) | -2324(13) | -4950(12) | -1097(14) | 244(11) |
| C(21P) | -3221(9)  | -5535(6)  | -536(11)  | 188(7)  |
| C(22P) | -3602(13) | -5444(15) | -279(14)  | 252(12) |



|        |           |           |           |         |
|--------|-----------|-----------|-----------|---------|
| C(23P) | -2866(10) | -4936(7)  | -143(5)   | 176(8)  |
| C(24P) | -2694(8)  | -5264(7)  | 141(8)    | 151(7)  |
| P(5)   | -9130(2)  | -3311(2)  | -3091(2)  | 117(2)  |
| C(25P) | -9432(7)  | -2865(6)  | -3139(9)  | 157(7)  |
| C(26P) | -9265(10) | -2545(9)  | -3439(10) | 185(8)  |
| C(27P) | -8692(5)  | -3112(7)  | -2826(6)  | 128(5)  |
| C(28P) | -8771(9)  | -2922(9)  | -2399(6)  | 156(7)  |
| C(29P) | -9402(7)  | -3593(7)  | -2696(8)  | 154(7)  |
| C(30P) | -9164(9)  | -3967(8)  | -2538(9)  | 173(8)  |
| P(6)   | -9588(2)  | -3912(2)  | -3822(3)  | 165(3)  |
| C(31P) | -9583(8)  | -4246(10) | -4261(9)  | 230(11) |
| C(32P) | -9971(10) | -4507(9)  | -4287(9)  | 215(9)  |
| C(33P) | -9956(5)  | -3533(8)  | -3760(10) | 212(9)  |
| C(34P) | -9826(8)  | -3264(12) | -4133(11) | 232(11) |
| C(35P) | -9785(10) | -4278(9)  | -3450(11) | 227(10) |
| C(36P) | -9513(10) | -4654(10) | -3447(9)  | 210(10) |
| P(1A)  | -10379(2) | -2989(2)  | -2112(2)  | 107(1)  |
| F(1A)  | -10815(4) | -3211(5)  | -2185(5)  | 162(4)  |
| F(2A)  | -9951(5)  | -2810(5)  | -2086(5)  | 166(4)  |
| F(3A)  | -10472(6) | -2892(5)  | -1671(5)  | 179(4)  |
| F(4A)  | -10220(5) | -3417(5)  | -2010(6)  | 180(4)  |
| F(5A)  | -10573(5) | -2574(5)  | -2258(5)  | 170(4)  |
| F(6A)  | -10266(4) | -3106(5)  | -2584(4)  | 153(4)  |
| P(2B)  | -7944(2)  | -2048(2)  | -3028(2)  | 107(1)  |
| F(1B)  | -7553(4)  | -2105(3)  | -3297(3)  | 123(3)  |
| F(2B)  | -8213(4)  | -2158(5)  | -3409(4)  | 156(4)  |
| F(3B)  | -7928(4)  | -2510(4)  | -2910(4)  | 137(3)  |
| F(4B)  | -7672(3)  | -1945(3)  | -2617(4)  | 119(3)  |
| F(5B)  | -7953(3)  | -1577(3)  | -3135(4)  | 121(3)  |
| F(6B)  | -8339(4)  | -1989(4)  | -2727(5)  | 148(4)  |
| P(3C)  | -3843(2)  | -4813(2)  | 1003(2)   | 130(2)  |
| F(1C)  | -4231(5)  | -4866(5)  | 1285(5)   | 179(4)  |
| F(2C)  | -4046(4)  | -4396(4)  | 828(4)    | 140(3)  |
| F(3C)  | -3663(4)  | -4548(5)  | 1366(4)   | 157(4)  |
| F(4C)  | -4060(6)  | -4991(6)  | 601(6)    | 202(5)  |
| F(5C)  | -3429(4)  | -4732(4)  | 743(4)    | 145(4)  |
| F(6C)  | -3699(6)  | -5248(5)  | 1126(6)   | 195(5)  |
| P(4D)  | -7793(4)  | -4560(4)  | -2516(4)  | 208(4)  |

|       |          |          |          |        |
|-------|----------|----------|----------|--------|
| F(1D) | -7579(6) | -4408(5) | -2090(6) | 183(4) |
| F(2D) | -7522(9) | -4953(7) | -2534(8) | 239(6) |
| F(3D) | -7409(6) | -4353(6) | -2802(6) | 193(5) |
| F(4D) | -8121(8) | -4735(8) | -2246(9) | 252(6) |
| F(5D) | -8006(8) | -4737(8) | -2880(9) | 257(6) |
| F(6D) | -8044(6) | -4156(7) | -2532(6) | 208(5) |
| P(5E) | -1676(2) | -4198(2) | 4(2)     | 125(2) |
| F(1E) | -1578(7) | -3925(7) | 391(6)   | 212(5) |
| F(2E) | -2086(6) | -3993(6) | 38(6)    | 221(5) |
| F(3E) | -1532(6) | -3890(6) | -274(7)  | 228(6) |
| F(4E) | -1867(6) | -4511(7) | 341(8)   | 246(6) |
| F(5E) | -1880(8) | -4436(8) | -292(8)  | 249(6) |
| F(6E) | -1324(6) | -4443(6) | -24(7)   | 218(5) |
| P(6F) | -2630(3) | -1576(3) | -4833(2) | 162(3) |
| F(1F) | -2539(7) | -1510(7) | -4363(4) | 217(5) |
| F(2F) | -3001(6) | -1818(7) | -4682(7) | 226(5) |
| F(3F) | -2715(7) | -1683(7) | -5293(4) | 205(5) |
| F(4F) | -2321(5) | -1264(5) | -4960(6) | 192(5) |
| F(5F) | -2914(7) | -1218(6) | -4912(7) | 231(5) |
| F(6F) | -2334(6) | -1925(6) | -4798(7) | 228(6) |

---

-

Table S3. Bond lengths [ $\text{\AA}$ ] and angles [ $^\circ$ ] for **3a**.

---

|              |           |
|--------------|-----------|
| Pt(1)-N(3)   | 2.059(11) |
| Pt(1)-N(4)#1 | 2.109(10) |
| Pt(1)-P(1)   | 2.273(3)  |
| Pt(1)-P(2)   | 2.278(3)  |
| Pt(2)-N(5)#2 | 2.083(12) |
| Pt(2)-N(1)   | 2.106(10) |
| Pt(2)-P(4)   | 2.270(4)  |
| Pt(2)-P(3)   | 2.279(4)  |
| Pt(3)-N(2)   | 2.088(11) |
| Pt(3)-N(6)#3 | 2.082(15) |
| Pt(3)-P(5)   | 2.276(5)  |
| Pt(3)-P(6)   | 2.285(6)  |
| N(1)-C(20)   | 1.290(17) |
| N(1)-C(18)   | 1.337(19) |
| N(2)-C(47)   | 1.33(2)   |
| N(2)-C(46)   | 1.35(2)   |
| N(3)-C(48)   | 1.331(18) |
| N(3)-C(59)   | 1.332(19) |
| N(4)-C(52)   | 1.307(19) |
| N(4)-C(51)   | 1.329(18) |
| N(4)-Pt(1)#3 | 2.109(10) |
| N(5)-C(68)   | 1.31(2)   |
| N(5)-C(56)   | 1.360(18) |
| N(5)-Pt(2)#2 | 2.083(12) |
| N(6)-C(70)   | 1.28(3)   |
| N(6)-C(72)   | 1.37(2)   |
| N(6)-Pt(3)#1 | 2.082(15) |
| C(1)-C(5)    | 1.389(18) |
| C(1)-C(2)    | 1.395(19) |
| C(2)-C(4)    | 1.40(2)   |
| C(2)-C(3)    | 1.472(17) |
| C(3)-C(17)   | 1.352(19) |
| C(3)-C(19)   | 1.368(19) |
| C(4)-C(7)    | 1.392(18) |
| C(5)-C(6)    | 1.365(19) |
| C(6)-C(7)    | 1.365(19) |

|             |           |
|-------------|-----------|
| C(6)-C(8)   | 1.513(17) |
| C(8)-C(15)  | 1.368(17) |
| C(8)-C(16)  | 1.419(18) |
| C(9)-C(10)  | 1.370(19) |
| C(9)-C(66)  | 1.380(17) |
| C(10)-C(14) | 1.39(2)   |
| C(10)-C(15) | 1.482(18) |
| C(11)-C(13) | 1.327(19) |
| C(11)-C(66) | 1.439(18) |
| C(11)-C(12) | 1.453(19) |
| C(12)-C(43) | 1.329(19) |
| C(12)-C(44) | 1.46(2)   |
| C(13)-C(14) | 1.43(2)   |
| C(15)-C(23) | 1.451(17) |
| C(16)-C(22) | 1.372(17) |
| C(16)-C(30) | 1.532(17) |
| C(17)-C(20) | 1.384(19) |
| C(18)-C(19) | 1.397(19) |
| C(21)-C(62) | 1.37(2)   |
| C(21)-C(63) | 1.44(2)   |
| C(21)-C(36) | 1.482(18) |
| C(22)-C(36) | 1.410(18) |
| C(22)-C(28) | 1.509(18) |
| C(23)-C(36) | 1.362(18) |
| C(23)-C(37) | 1.476(17) |
| C(24)-C(25) | 1.39(2)   |
| C(24)-C(29) | 1.42(2)   |
| C(25)-C(26) | 1.35(2)   |
| C(25)-C(60) | 1.43(2)   |
| C(26)-C(27) | 1.40(2)   |
| C(27)-C(28) | 1.33(2)   |
| C(28)-C(29) | 1.39(2)   |
| C(30)-C(32) | 1.42(2)   |
| C(30)-C(31) | 1.40(2)   |
| C(31)-C(34) | 1.378(18) |
| C(32)-C(33) | 1.426(18) |
| C(33)-C(35) | 1.38(2)   |
| C(34)-C(35) | 1.41(2)   |

|             |           |
|-------------|-----------|
| C(35)-C(49) | 1.511(17) |
| C(37)-C(39) | 1.38(2)   |
| C(37)-C(57) | 1.44(2)   |
| C(38)-C(39) | 1.373(19) |
| C(38)-C(41) | 1.40(2)   |
| C(40)-C(57) | 1.401(19) |
| C(40)-C(41) | 1.38(2)   |
| C(41)-C(42) | 1.475(19) |
| C(42)-C(45) | 1.42(2)   |
| C(42)-C(58) | 1.44(2)   |
| C(43)-C(56) | 1.403(19) |
| C(44)-C(68) | 1.38(2)   |
| C(45)-C(46) | 1.45(2)   |
| C(47)-C(58) | 1.34(2)   |
| C(48)-C(67) | 1.431(19) |
| C(49)-C(50) | 1.326(19) |
| C(49)-C(67) | 1.37(2)   |
| C(50)-C(59) | 1.441(18) |
| C(51)-C(53) | 1.386(19) |
| C(52)-C(64) | 1.385(19) |
| C(53)-C(54) | 1.47(2)   |
| C(54)-C(64) | 1.37(2)   |
| C(54)-C(55) | 1.493(19) |
| C(55)-C(65) | 1.40(2)   |
| C(55)-C(69) | 1.40(2)   |
| C(60)-C(61) | 1.37(3)   |
| C(60)-C(71) | 1.23(3)   |
| C(61)-C(72) | 1.42(3)   |
| C(62)-C(65) | 1.38(2)   |
| C(63)-C(69) | 1.38(2)   |
| C(70)-C(71) | 1.48(3)   |
| P(1)-C(1P)  | 1.782(12) |
| P(1)-C(5P)  | 1.786(11) |
| P(1)-C(3P)  | 1.833(12) |
| C(1P)-C(2P) | 1.515(14) |
| C(3P)-C(4P) | 1.533(14) |
| C(5P)-C(6P) | 1.510(13) |
| P(2)-C(11P) | 1.797(11) |

|               |           |
|---------------|-----------|
| P(2)-C(9P)    | 1.814(10) |
| P(2)-C(7P)    | 1.832(10) |
| C(7P)-C(8P)   | 1.522(13) |
| C(9P)-C(10P)  | 1.521(13) |
| C(11P)-C(12P) | 1.540(13) |
| P(3)-C(17P)   | 1.784(12) |
| P(3)-C(15P)   | 1.817(12) |
| P(3)-C(13P)   | 1.819(13) |
| C(13P)-C(14P) | 1.538(15) |
| C(15P)-C(16P) | 1.513(14) |
| C(17P)-C(18P) | 1.514(15) |
| P(4)-C(19P)   | 1.806(14) |
| P(4)-C(23P)   | 1.807(13) |
| P(4)-C(21P)   | 1.806(14) |
| C(19P)-C(20P) | 1.553(16) |
| C(21P)-C(22P) | 1.532(16) |
| C(23P)-C(24P) | 1.521(15) |
| P(5)-C(25P)   | 1.785(13) |
| P(5)-C(27P)   | 1.797(13) |
| P(5)-C(29P)   | 1.804(13) |
| C(25P)-C(26P) | 1.527(15) |
| C(27P)-C(28P) | 1.522(14) |
| C(29P)-C(30P) | 1.547(15) |
| P(6)-C(33P)   | 1.753(14) |
| P(6)-C(31P)   | 1.783(14) |
| P(6)-C(35P)   | 1.814(14) |
| C(31P)-C(32P) | 1.546(15) |
| C(33P)-C(34P) | 1.543(15) |
| C(35P)-C(36P) | 1.531(16) |
| P(1A)-F(3A)   | 1.474(16) |
| P(1A)-F(4A)   | 1.540(16) |
| P(1A)-F(2A)   | 1.531(15) |
| P(1A)-F(5A)   | 1.582(15) |
| P(1A)-F(6A)   | 1.601(15) |
| P(1A)-F(1A)   | 1.631(15) |
| P(2B)-F(2B)   | 1.547(14) |
| P(2B)-F(1B)   | 1.559(12) |
| P(2B)-F(3B)   | 1.569(13) |

|             |           |
|-------------|-----------|
| P(2B)-F(5B) | 1.590(12) |
| P(2B)-F(4B) | 1.624(12) |
| P(2B)-F(6B) | 1.633(13) |
| P(3C)-F(6C) | 1.560(17) |
| P(3C)-F(4C) | 1.582(18) |
| P(3C)-F(1C) | 1.575(15) |
| P(3C)-F(3C) | 1.568(15) |
| P(3C)-F(5C) | 1.619(13) |
| P(3C)-F(2C) | 1.629(14) |
| P(4D)-F(5D) | 1.48(2)   |
| P(4D)-F(2D) | 1.57(3)   |
| P(4D)-F(6D) | 1.57(2)   |
| P(4D)-F(4D) | 1.50(3)   |
| P(4D)-F(1D) | 1.61(2)   |
| P(4D)-F(3D) | 1.70(2)   |
| P(5E)-F(6E) | 1.42(2)   |
| P(5E)-F(3E) | 1.426(19) |
| P(5E)-F(5E) | 1.40(2)   |
| P(5E)-F(1E) | 1.563(19) |
| P(5E)-F(2E) | 1.51(2)   |
| P(5E)-F(4E) | 1.62(2)   |
| P(6F)-F(4F) | 1.505(12) |
| P(6F)-F(6F) | 1.513(14) |
| P(6F)-F(5F) | 1.529(14) |
| P(6F)-F(3F) | 1.535(13) |
| P(6F)-F(2F) | 1.535(13) |
| P(6F)-F(1F) | 1.546(13) |

|                   |           |
|-------------------|-----------|
| N(3)-Pt(1)-N(4)#1 | 81.1(4)   |
| N(3)-Pt(1)-P(1)   | 169.7(3)  |
| N(4)#1-Pt(1)-P(1) | 88.6(3)   |
| N(3)-Pt(1)-P(2)   | 90.7(3)   |
| N(4)#1-Pt(1)-P(2) | 171.8(3)  |
| P(1)-Pt(1)-P(2)   | 99.60(13) |
| N(5)#2-Pt(2)-N(1) | 80.9(4)   |
| N(5)#2-Pt(2)-P(4) | 91.0(3)   |
| N(1)-Pt(2)-P(4)   | 171.8(3)  |
| N(5)#2-Pt(2)-P(3) | 168.9(3)  |

|                    |           |
|--------------------|-----------|
| N(1)-Pt(2)-P(3)    | 90.2(3)   |
| P(4)-Pt(2)-P(3)    | 97.99(17) |
| N(2)-Pt(3)-N(6)#3  | 79.9(5)   |
| N(2)-Pt(3)-P(5)    | 91.9(3)   |
| N(6)#3-Pt(3)-P(5)  | 171.2(4)  |
| N(2)-Pt(3)-P(6)    | 171.1(4)  |
| N(6)#3-Pt(3)-P(6)  | 91.2(4)   |
| P(5)-Pt(3)-P(6)    | 97.0(3)   |
| C(20)-N(1)-C(18)   | 120.3(11) |
| C(20)-N(1)-Pt(2)   | 120.3(9)  |
| C(18)-N(1)-Pt(2)   | 119.4(9)  |
| C(47)-N(2)-C(46)   | 119.6(13) |
| C(47)-N(2)-Pt(3)   | 124.2(10) |
| C(46)-N(2)-Pt(3)   | 115.9(12) |
| C(48)-N(3)-C(59)   | 119.9(12) |
| C(48)-N(3)-Pt(1)   | 120.3(9)  |
| C(59)-N(3)-Pt(1)   | 119.8(9)  |
| C(52)-N(4)-C(51)   | 121.6(11) |
| C(52)-N(4)-Pt(1)#3 | 119.0(10) |
| C(51)-N(4)-Pt(1)#3 | 117.3(9)  |
| C(68)-N(5)-C(56)   | 115.6(12) |
| C(68)-N(5)-Pt(2)#2 | 123.2(10) |
| C(56)-N(5)-Pt(2)#2 | 119.5(11) |
| C(70)-N(6)-C(72)   | 118.2(17) |
| C(70)-N(6)-Pt(3)#1 | 120.0(15) |
| C(72)-N(6)-Pt(3)#1 | 120.6(13) |
| C(5)-C(1)-C(2)     | 122.5(13) |
| C(1)-C(2)-C(4)     | 116.9(12) |
| C(1)-C(2)-C(3)     | 122.4(12) |
| C(4)-C(2)-C(3)     | 120.7(12) |
| C(17)-C(3)-C(19)   | 119.5(12) |
| C(17)-C(3)-C(2)    | 122.1(13) |
| C(19)-C(3)-C(2)    | 118.5(12) |
| C(7)-C(4)-C(2)     | 120.4(13) |
| C(1)-C(5)-C(6)     | 118.5(13) |
| C(5)-C(6)-C(7)     | 121.5(12) |
| C(5)-C(6)-C(8)     | 120.3(12) |
| C(7)-C(6)-C(8)     | 118.2(13) |



|                   |           |
|-------------------|-----------|
| C(4)-C(7)-C(6)    | 120.2(13) |
| C(15)-C(8)-C(16)  | 118.8(11) |
| C(15)-C(8)-C(6)   | 120.2(11) |
| C(16)-C(8)-C(6)   | 120.7(10) |
| C(10)-C(9)-C(66)  | 124.1(13) |
| C(9)-C(10)-C(14)  | 116.0(12) |
| C(9)-C(10)-C(15)  | 120.3(12) |
| C(14)-C(10)-C(15) | 123.2(12) |
| C(13)-C(11)-C(66) | 118.4(12) |
| C(13)-C(11)-C(12) | 124.4(12) |
| C(66)-C(11)-C(12) | 117.2(11) |
| C(43)-C(12)-C(44) | 115.5(13) |
| C(43)-C(12)-C(11) | 124.8(12) |
| C(44)-C(12)-C(11) | 119.7(13) |
| C(11)-C(13)-C(14) | 121.6(14) |
| C(10)-C(14)-C(13) | 121.1(13) |
| C(8)-C(15)-C(23)  | 119.1(11) |
| C(8)-C(15)-C(10)  | 120.7(11) |
| C(23)-C(15)-C(10) | 120.0(10) |
| C(22)-C(16)-C(8)  | 122.5(11) |
| C(22)-C(16)-C(30) | 118.0(11) |
| C(8)-C(16)-C(30)  | 119.4(11) |
| C(3)-C(17)-C(20)  | 118.5(13) |
| N(1)-C(18)-C(19)  | 119.8(13) |
| C(3)-C(19)-C(18)  | 119.1(13) |
| N(1)-C(20)-C(17)  | 122.7(13) |
| C(62)-C(21)-C(63) | 118.3(12) |
| C(62)-C(21)-C(36) | 120.1(12) |
| C(63)-C(21)-C(36) | 121.5(12) |
| C(16)-C(22)-C(36) | 118.1(12) |
| C(16)-C(22)-C(28) | 120.4(11) |
| C(36)-C(22)-C(28) | 121.4(11) |
| C(36)-C(23)-C(15) | 120.1(11) |
| C(36)-C(23)-C(37) | 120.3(11) |
| C(15)-C(23)-C(37) | 119.6(11) |
| C(25)-C(24)-C(29) | 122.7(16) |
| C(26)-C(25)-C(24) | 115.3(15) |
| C(26)-C(25)-C(60) | 125.0(16) |

|                   |           |
|-------------------|-----------|
| C(24)-C(25)-C(60) | 119.2(15) |
| C(25)-C(26)-C(27) | 121.5(17) |
| C(28)-C(27)-C(26) | 122.9(15) |
| C(27)-C(28)-C(29) | 118.2(14) |
| C(27)-C(28)-C(22) | 123.6(13) |
| C(29)-C(28)-C(22) | 117.8(14) |
| C(28)-C(29)-C(24) | 118.0(16) |
| C(32)-C(30)-C(31) | 121.9(11) |
| C(32)-C(30)-C(16) | 117.5(12) |
| C(31)-C(30)-C(16) | 120.3(13) |
| C(34)-C(31)-C(30) | 119.2(14) |
| C(30)-C(32)-C(33) | 117.7(14) |
| C(35)-C(33)-C(32) | 119.4(14) |
| C(31)-C(34)-C(35) | 119.9(14) |
| C(33)-C(35)-C(34) | 121.7(11) |
| C(33)-C(35)-C(49) | 119.2(12) |
| C(34)-C(35)-C(49) | 119.0(12) |
| C(23)-C(36)-C(22) | 121.1(11) |
| C(23)-C(36)-C(21) | 120.3(11) |
| C(22)-C(36)-C(21) | 118.5(12) |
| C(39)-C(37)-C(57) | 119.3(12) |
| C(39)-C(37)-C(23) | 123.6(12) |
| C(57)-C(37)-C(23) | 117.0(12) |
| C(39)-C(38)-C(41) | 121.6(15) |
| C(37)-C(39)-C(38) | 120.1(14) |
| C(57)-C(40)-C(41) | 119.9(13) |
| C(38)-C(41)-C(40) | 119.6(12) |
| C(38)-C(41)-C(42) | 120.7(14) |
| C(40)-C(41)-C(42) | 119.4(12) |
| C(45)-C(42)-C(41) | 117.6(13) |
| C(45)-C(42)-C(58) | 120.1(13) |
| C(41)-C(42)-C(58) | 122.3(15) |
| C(12)-C(43)-C(56) | 121.5(14) |
| C(68)-C(44)-C(12) | 118.9(15) |
| C(42)-C(45)-C(46) | 116.5(15) |
| N(2)-C(46)-C(45)  | 120.6(17) |
| N(2)-C(47)-C(58)  | 126.1(16) |
| N(3)-C(48)-C(67)  | 121.6(13) |

|                   |           |
|-------------------|-----------|
| C(50)-C(49)-C(67) | 122.1(12) |
| C(50)-C(49)-C(35) | 121.3(12) |
| C(67)-C(49)-C(35) | 116.5(12) |
| C(49)-C(50)-C(59) | 118.5(13) |
| N(4)-C(51)-C(53)  | 122.7(13) |
| N(4)-C(52)-C(64)  | 121.4(14) |
| C(51)-C(53)-C(54) | 115.6(14) |
| C(64)-C(54)-C(53) | 118.4(12) |
| C(64)-C(54)-C(55) | 123.2(13) |
| C(53)-C(54)-C(55) | 118.2(13) |
| C(65)-C(55)-C(69) | 120.2(13) |
| C(65)-C(55)-C(54) | 119.7(14) |
| C(69)-C(55)-C(54) | 119.9(14) |
| N(5)-C(56)-C(43)  | 123.4(14) |
| C(40)-C(57)-C(37) | 119.5(13) |
| C(47)-C(58)-C(42) | 116.5(16) |
| N(3)-C(59)-C(50)  | 120.7(13) |
| C(61)-C(60)-C(71) | 115.5(19) |
| C(61)-C(60)-C(25) | 119.6(17) |
| C(71)-C(60)-C(25) | 124.0(19) |
| C(60)-C(61)-C(72) | 120.2(19) |
| C(65)-C(62)-C(21) | 121.1(15) |
| C(69)-C(63)-C(21) | 120.8(14) |
| C(54)-C(64)-C(52) | 119.8(14) |
| C(62)-C(65)-C(55) | 120.4(15) |
| C(9)-C(66)-C(11)  | 118.7(12) |
| C(49)-C(67)-C(48) | 117.0(13) |
| N(5)-C(68)-C(44)  | 125.1(14) |
| C(63)-C(69)-C(55) | 118.9(14) |
| N(6)-C(70)-C(71)  | 119(2)    |
| C(60)-C(71)-C(70) | 125(2)    |
| N(6)-C(72)-C(61)  | 120.6(19) |
| C(1P)-P(1)-C(5P)  | 106.2(10) |
| C(1P)-P(1)-C(3P)  | 107.1(8)  |
| C(5P)-P(1)-C(3P)  | 104.2(9)  |
| C(1P)-P(1)-Pt(1)  | 108.9(7)  |
| C(5P)-P(1)-Pt(1)  | 121.5(5)  |
| C(3P)-P(1)-Pt(1)  | 108.1(6)  |

|                    |           |
|--------------------|-----------|
| C(2P)-C(1P)-P(1)   | 114.7(12) |
| C(4P)-C(3P)-P(1)   | 116.6(13) |
| C(6P)-C(5P)-P(1)   | 115.5(11) |
| C(11P)-P(2)-C(9P)  | 107.7(6)  |
| C(11P)-P(2)-C(7P)  | 105.6(7)  |
| C(9P)-P(2)-C(7P)   | 102.3(7)  |
| C(11P)-P(2)-Pt(1)  | 114.7(5)  |
| C(9P)-P(2)-Pt(1)   | 113.3(5)  |
| C(7P)-P(2)-Pt(1)   | 112.1(4)  |
| C(8P)-C(7P)-P(2)   | 114.5(10) |
| C(10P)-C(9P)-P(2)  | 115.6(10) |
| C(12P)-C(11P)-P(2) | 111.5(9)  |
| C(17P)-P(3)-C(15P) | 105.1(11) |
| C(17P)-P(3)-C(13P) | 105.6(9)  |
| C(15P)-P(3)-C(13P) | 103.9(12) |
| C(17P)-P(3)-Pt(2)  | 119.8(7)  |
| C(15P)-P(3)-Pt(2)  | 112.7(5)  |
| C(13P)-P(3)-Pt(2)  | 108.4(9)  |
| C(14P)-C(13P)-P(3) | 113.5(17) |
| C(16P)-C(15P)-P(3) | 119.0(12) |
| C(18P)-C(17P)-P(3) | 107.4(14) |
| C(19P)-P(4)-C(23P) | 124.1(14) |
| C(19P)-P(4)-C(21P) | 94.5(16)  |
| C(23P)-P(4)-C(21P) | 92.7(15)  |
| C(19P)-P(4)-Pt(2)  | 107.3(10) |
| C(23P)-P(4)-Pt(2)  | 120.5(7)  |
| C(21P)-P(4)-Pt(2)  | 112.4(10) |
| C(20P)-C(19P)-P(4) | 97(2)     |
| C(22P)-C(21P)-P(4) | 111(2)    |
| C(24P)-C(23P)-P(4) | 117.3(16) |
| C(25P)-P(5)-C(27P) | 100.9(13) |
| C(25P)-P(5)-C(29P) | 102.0(11) |
| C(27P)-P(5)-C(29P) | 105.0(12) |
| C(25P)-P(5)-Pt(3)  | 119.1(9)  |
| C(27P)-P(5)-Pt(3)  | 111.8(6)  |
| C(29P)-P(5)-Pt(3)  | 116.1(9)  |
| C(26P)-C(25P)-P(5) | 115.0(17) |
| C(28P)-C(27P)-P(5) | 115.7(16) |

|                    |           |
|--------------------|-----------|
| C(30P)-C(29P)-P(5) | 112.7(16) |
| C(33P)-P(6)-C(31P) | 122.4(17) |
| C(33P)-P(6)-C(35P) | 98.8(15)  |
| C(31P)-P(6)-C(35P) | 96.2(18)  |
| C(33P)-P(6)-Pt(3)  | 110.4(9)  |
| C(31P)-P(6)-Pt(3)  | 111.8(9)  |
| C(35P)-P(6)-Pt(3)  | 115.8(13) |
| C(32P)-C(31P)-P(6) | 112.2(15) |
| C(34P)-C(33P)-P(6) | 97.5(15)  |
| C(36P)-C(35P)-P(6) | 109(2)    |
| F(3A)-P(1A)-F(4A)  | 94.0(10)  |
| F(3A)-P(1A)-F(2A)  | 93.3(10)  |
| F(4A)-P(1A)-F(2A)  | 91.5(10)  |
| F(3A)-P(1A)-F(5A)  | 90.5(10)  |
| F(4A)-P(1A)-F(5A)  | 173.2(10) |
| F(2A)-P(1A)-F(5A)  | 93.3(9)   |
| F(3A)-P(1A)-F(6A)  | 177.9(11) |
| F(4A)-P(1A)-F(6A)  | 84.1(9)   |
| F(2A)-P(1A)-F(6A)  | 86.0(9)   |
| F(5A)-P(1A)-F(6A)  | 91.5(9)   |
| F(3A)-P(1A)-F(1A)  | 92.9(10)  |
| F(4A)-P(1A)-F(1A)  | 85.2(9)   |
| F(2A)-P(1A)-F(1A)  | 173.2(9)  |
| F(5A)-P(1A)-F(1A)  | 89.4(9)   |
| F(6A)-P(1A)-F(1A)  | 87.7(8)   |
| F(2B)-P(2B)-F(1B)  | 90.9(8)   |
| F(2B)-P(2B)-F(3B)  | 89.0(8)   |
| F(1B)-P(2B)-F(3B)  | 89.4(7)   |
| F(2B)-P(2B)-F(5B)  | 92.8(7)   |
| F(1B)-P(2B)-F(5B)  | 90.8(7)   |
| F(3B)-P(2B)-F(5B)  | 178.3(8)  |
| F(2B)-P(2B)-F(4B)  | 177.7(9)  |
| F(1B)-P(2B)-F(4B)  | 90.7(6)   |
| F(3B)-P(2B)-F(4B)  | 89.4(6)   |
| F(5B)-P(2B)-F(4B)  | 88.8(6)   |
| F(2B)-P(2B)-F(6B)  | 91.8(8)   |
| F(1B)-P(2B)-F(6B)  | 177.2(8)  |
| F(3B)-P(2B)-F(6B)  | 90.1(8)   |

|                   |           |
|-------------------|-----------|
| F(5B)-P(2B)-F(6B) | 89.7(7)   |
| F(4B)-P(2B)-F(6B) | 86.5(7)   |
| F(6C)-P(3C)-F(4C) | 90.0(12)  |
| F(6C)-P(3C)-F(1C) | 90.1(9)   |
| F(4C)-P(3C)-F(1C) | 93.1(11)  |
| F(6C)-P(3C)-F(3C) | 102.3(10) |
| F(4C)-P(3C)-F(3C) | 167.7(11) |
| F(1C)-P(3C)-F(3C) | 87.1(9)   |
| F(6C)-P(3C)-F(5C) | 91.5(9)   |
| F(4C)-P(3C)-F(5C) | 91.5(9)   |
| F(1C)-P(3C)-F(5C) | 175.2(10) |
| F(3C)-P(3C)-F(5C) | 88.1(8)   |
| F(6C)-P(3C)-F(2C) | 170.8(11) |
| F(4C)-P(3C)-F(2C) | 81.2(10)  |
| F(1C)-P(3C)-F(2C) | 87.4(8)   |
| F(3C)-P(3C)-F(2C) | 86.5(8)   |
| F(5C)-P(3C)-F(2C) | 91.7(8)   |
| F(5D)-P(4D)-F(2D) | 85.2(16)  |
| F(5D)-P(4D)-F(6D) | 93.2(14)  |
| F(2D)-P(4D)-F(6D) | 175.1(16) |
| F(5D)-P(4D)-F(4D) | 87.4(15)  |
| F(2D)-P(4D)-F(4D) | 96.6(15)  |
| F(6D)-P(4D)-F(4D) | 87.9(15)  |
| F(5D)-P(4D)-F(1D) | 173.9(15) |
| F(2D)-P(4D)-F(1D) | 92.4(12)  |
| F(6D)-P(4D)-F(1D) | 89.6(12)  |
| F(4D)-P(4D)-F(1D) | 87.3(15)  |
| F(5D)-P(4D)-F(3D) | 95.1(15)  |
| F(2D)-P(4D)-F(3D) | 83.6(14)  |
| F(6D)-P(4D)-F(3D) | 92.0(11)  |
| F(4D)-P(4D)-F(3D) | 177.5(15) |
| F(1D)-P(4D)-F(3D) | 90.2(10)  |
| F(6E)-P(5E)-F(3E) | 95.4(9)   |
| F(6E)-P(5E)-F(5E) | 91.8(15)  |
| F(3E)-P(5E)-F(5E) | 98.0(16)  |
| F(6E)-P(5E)-F(1E) | 102.0(13) |
| F(3E)-P(5E)-F(1E) | 90.8(13)  |
| F(5E)-P(5E)-F(1E) | 162.9(16) |

|                   |           |
|-------------------|-----------|
| F(6E)-P(5E)-F(2E) | 171.7(12) |
| F(3E)-P(5E)-F(2E) | 91.4(8)   |
| F(5E)-P(5E)-F(2E) | 82.5(14)  |
| F(1E)-P(5E)-F(2E) | 82.6(12)  |
| F(6E)-P(5E)-F(4E) | 89.8(8)   |
| F(3E)-P(5E)-F(4E) | 174.2(12) |
| F(5E)-P(5E)-F(4E) | 84.4(15)  |
| F(1E)-P(5E)-F(4E) | 85.4(13)  |
| F(2E)-P(5E)-F(4E) | 83.7(8)   |
| F(4F)-P(6F)-F(6F) | 95.9(13)  |
| F(4F)-P(6F)-F(5F) | 80.8(12)  |
| F(6F)-P(6F)-F(5F) | 174.4(14) |
| F(4F)-P(6F)-F(3F) | 91.3(11)  |
| F(6F)-P(6F)-F(3F) | 90.8(14)  |
| F(5F)-P(6F)-F(3F) | 84.7(13)  |
| F(4F)-P(6F)-F(2F) | 168.0(15) |
| F(6F)-P(6F)-F(2F) | 95.5(13)  |
| F(5F)-P(6F)-F(2F) | 88.1(14)  |
| F(3F)-P(6F)-F(2F) | 92.1(12)  |
| F(4F)-P(6F)-F(1F) | 91.8(12)  |
| F(6F)-P(6F)-F(1F) | 84.9(13)  |
| F(5F)-P(6F)-F(1F) | 99.7(14)  |
| F(3F)-P(6F)-F(1F) | 174.9(14) |
| F(2F)-P(6F)-F(1F) | 85.6(12)  |

---

Symmetry transformations used to generate equivalent atoms:

#1  $y, -x-1, -z-1$     #2  $-x-1, -y-1, z$     #3  $-y-1, x, -z-1$

Table S4. Anisotropic displacement parameters ( $\text{\AA}^2 \times 10^3$ ) for **3a**. The anisotropic displacement factor exponent takes the form:  $-2\pi^2 [ h^2 a^{*2} U^{11} + \dots + 2 h k a^* b^* U^{12} ]$

|       | U <sup>11</sup> | U <sup>22</sup> | U <sup>33</sup> | U <sup>23</sup> | U <sup>13</sup> | U <sup>12</sup> |
|-------|-----------------|-----------------|-----------------|-----------------|-----------------|-----------------|
| Pt(1) | 56(1)           | 85(1)           | 71(1)           | -14(1)          | -4(1)           | -18(1)          |
| Pt(2) | 111(1)          | 62(1)           | 90(1)           | 0(1)            | -52(1)          | 2(1)            |
| Pt(3) | 50(1)           | 139(1)          | 115(1)          | -38(1)          | 15(1)           | 7(1)            |
| N(1)  | 86(6)           | 68(6)           | 62(5)           | -4(4)           | -12(4)          | 0(5)            |
| N(2)  | 58(4)           | 117(8)          | 83(7)           | -25(6)          | 8(5)            | 18(4)           |
| N(3)  | 72(5)           | 88(7)           | 78(6)           | -6(5)           | -13(5)          | -18(4)          |
| N(4)  | 91(6)           | 78(6)           | 60(5)           | -6(5)           | -14(5)          | 23(6)           |
| N(5)  | 75(6)           | 70(6)           | 98(7)           | -8(5)           | 32(5)           | 5(5)            |
| N(6)  | 113(8)          | 56(6)           | 141(10)         | 8(6)            | 4(7)            | -19(6)          |
| C(1)  | 61(7)           | 76(6)           | 80(8)           | 11(5)           | -10(5)          | -3(6)           |
| C(2)  | 80(7)           | 81(6)           | 56(6)           | 4(5)            | -10(5)          | 3(6)            |
| C(3)  | 70(6)           | 77(7)           | 58(6)           | -3(5)           | -13(5)          | 6(5)            |
| C(4)  | 69(7)           | 85(6)           | 65(7)           | -1(5)           | -13(5)          | 4(6)            |
| C(5)  | 62(7)           | 86(6)           | 79(8)           | 9(6)            | -14(5)          | -3(6)           |
| C(6)  | 57(6)           | 92(6)           | 61(6)           | 21(5)           | -5(4)           | -4(6)           |
| C(7)  | 75(7)           | 79(6)           | 64(7)           | 14(5)           | -9(5)           | 2(6)            |
| C(8)  | 56(5)           | 94(8)           | 69(7)           | 25(5)           | -3(4)           | -1(5)           |
| C(9)  | 51(6)           | 79(7)           | 73(5)           | 2(5)            | 13(5)           | 1(5)            |
| C(10) | 48(6)           | 101(8)          | 66(5)           | 9(5)            | -2(5)           | -3(5)           |
| C(11) | 57(6)           | 72(6)           | 73(5)           | -3(5)           | 1(5)            | 4(5)            |
| C(12) | 63(6)           | 66(6)           | 78(6)           | -7(5)           | 14(5)           | 3(5)            |
| C(13) | 68(7)           | 95(8)           | 78(6)           | -1(6)           | 6(6)            | -12(6)          |
| C(14) | 70(8)           | 111(9)          | 76(7)           | -3(6)           | 0(6)            | -19(7)          |
| C(15) | 52(5)           | 89(7)           | 62(6)           | 5(5)            | -4(4)           | -6(5)           |
| C(16) | 54(5)           | 98(8)           | 71(7)           | 23(5)           | -12(5)          | -8(5)           |
| C(17) | 75(6)           | 93(9)           | 68(7)           | 12(6)           | -8(5)           | -8(6)           |
| C(18) | 89(6)           | 88(9)           | 75(8)           | 23(6)           | -12(6)          | -4(7)           |
| C(19) | 68(6)           | 90(9)           | 68(7)           | 11(5)           | -4(5)           | 8(6)            |
| C(20) | 74(7)           | 71(7)           | 72(7)           | 1(5)            | -15(5)          | -1(6)           |
| C(21) | 54(6)           | 93(8)           | 77(6)           | 10(5)           | 2(5)            | 15(5)           |
| C(22) | 59(5)           | 89(7)           | 71(7)           | 15(5)           | -1(4)           | 8(5)            |
| C(23) | 56(5)           | 92(8)           | 60(6)           | 1(5)            | 1(4)            | 2(5)            |
| C(24) | 135(13)         | 107(8)          | 123(12)         | 23(9)           | 60(10)          | 14(9)           |



|       |         |         |         |        |        |         |
|-------|---------|---------|---------|--------|--------|---------|
| C(25) | 92(9)   | 92(7)   | 85(8)   | 6(6)   | 18(6)  | 0(7)    |
| C(26) | 139(13) | 95(8)   | 90(10)  | 25(7)  | 31(8)  | 16(8)   |
| C(27) | 110(11) | 98(7)   | 76(8)   | 15(7)  | 17(7)  | 8(8)    |
| C(28) | 66(6)   | 92(6)   | 55(6)   | 17(5)  | -3(4)  | 0(5)    |
| C(29) | 132(13) | 97(8)   | 116(12) | 16(8)  | 54(9)  | 12(9)   |
| C(30) | 48(5)   | 99(7)   | 74(7)   | -2(6)  | 3(5)   | -9(4)   |
| C(31) | 51(5)   | 105(7)  | 85(8)   | 12(7)  | -5(6)  | -16(5)  |
| C(32) | 56(5)   | 108(7)  | 102(9)  | 18(8)  | -7(6)  | -9(5)   |
| C(33) | 58(5)   | 97(7)   | 90(8)   | -7(7)  | -6(6)  | -13(5)  |
| C(34) | 51(5)   | 99(7)   | 87(8)   | 1(7)   | -5(6)  | -4(5)   |
| C(35) | 51(5)   | 106(7)  | 68(7)   | -2(6)  | -6(5)  | -15(4)  |
| C(36) | 57(5)   | 86(8)   | 68(6)   | 7(5)   | 2(4)   | 13(5)   |
| C(37) | 56(5)   | 105(8)  | 57(7)   | 7(5)   | -3(4)  | 3(5)    |
| C(38) | 56(5)   | 131(11) | 91(9)   | -26(8) | 10(6)  | -3(6)   |
| C(39) | 58(5)   | 119(10) | 92(9)   | -28(7) | 8(6)   | 1(6)    |
| C(40) | 56(5)   | 109(9)  | 89(9)   | -9(7)  | -9(6)  | 22(5)   |
| C(41) | 57(5)   | 121(9)  | 59(7)   | 3(6)   | 1(5)   | 9(5)    |
| C(42) | 59(5)   | 111(8)  | 76(8)   | -12(6) | -5(5)  | 10(5)   |
| C(43) | 75(7)   | 73(7)   | 74(6)   | -1(5)  | 22(5)  | 3(6)    |
| C(44) | 73(7)   | 97(9)   | 94(8)   | -3(6)  | 20(6)  | -4(6)   |
| C(45) | 68(6)   | 115(9)  | 108(10) | 5(8)   | 6(7)   | 12(6)   |
| C(46) | 68(6)   | 136(10) | 111(11) | 14(9)  | 10(7)  | 13(6)   |
| C(47) | 55(5)   | 129(9)  | 109(11) | 0(9)   | 0(7)   | 14(6)   |
| C(48) | 67(5)   | 96(9)   | 89(9)   | 4(6)   | -1(6)  | -29(6)  |
| C(49) | 66(5)   | 79(7)   | 67(7)   | -4(5)  | -7(5)  | -13(4)  |
| C(50) | 53(5)   | 100(8)  | 66(7)   | 2(6)   | -8(5)  | -15(5)  |
| C(51) | 91(7)   | 66(7)   | 75(7)   | 12(6)  | -14(5) | 8(6)    |
| C(52) | 92(8)   | 102(10) | 65(7)   | -3(7)  | -12(5) | 35(8)   |
| C(53) | 83(7)   | 87(9)   | 82(7)   | 18(7)  | -12(5) | -3(7)   |
| C(54) | 77(6)   | 82(8)   | 75(6)   | 10(6)  | -16(5) | 18(6)   |
| C(55) | 75(7)   | 94(8)   | 79(6)   | 16(6)  | -15(6) | 6(6)    |
| C(56) | 89(7)   | 81(8)   | 65(6)   | -9(5)  | 14(6)  | 3(6)    |
| C(57) | 67(5)   | 91(8)   | 94(9)   | -8(7)  | -8(6)  | 3(6)    |
| C(58) | 67(6)   | 108(9)  | 103(10) | -12(7) | 11(7)  | 17(5)   |
| C(59) | 63(5)   | 85(8)   | 93(9)   | -9(6)  | -9(6)  | -8(6)   |
| C(60) | 89(8)   | 102(9)  | 105(9)  | 25(7)  | 23(6)  | 8(7)    |
| C(61) | 130(10) | 139(14) | 97(10)  | 2(8)   | 3(8)   | -56(11) |
| C(62) | 90(9)   | 125(11) | 72(6)   | 5(7)   | -9(7)  | 39(8)   |

|        |         |         |         |         |         |         |
|--------|---------|---------|---------|---------|---------|---------|
| C(63)  | 98(10)  | 97(9)   | 76(7)   | 5(6)    | -10(6)  | 24(7)   |
| C(64)  | 83(7)   | 98(9)   | 74(7)   | 12(7)   | -14(5)  | 12(7)   |
| C(65)  | 88(9)   | 113(10) | 77(7)   | 7(6)    | -14(6)  | 30(7)   |
| C(66)  | 63(6)   | 60(6)   | 66(6)   | 7(4)    | 9(5)    | 13(5)   |
| C(67)  | 63(6)   | 108(9)  | 84(9)   | 15(6)   | -13(6)  | -23(6)  |
| C(68)  | 73(8)   | 61(7)   | 114(9)  | 0(6)    | 18(6)   | -8(6)   |
| C(69)  | 88(9)   | 94(9)   | 83(7)   | 2(6)    | -21(7)  | 24(7)   |
| C(70)  | 118(10) | 181(16) | 175(15) | 96(13)  | -7(10)  | -34(12) |
| C(71)  | 122(11) | 213(18) | 153(14) | 91(12)  | 3(9)    | -22(12) |
| C(72)  | 114(11) | 134(14) | 120(12) | 3(9)    | -2(8)   | -51(10) |
| P(1)   | 63(2)   | 107(3)  | 92(2)   | -31(2)  | 8(2)    | -17(2)  |
| C(1P)  | 104(10) | 123(8)  | 130(11) | -26(7)  | 40(10)  | 5(8)    |
| C(2P)  | 115(9)  | 122(8)  | 130(9)  | -4(7)   | -17(8)  | 12(8)   |
| C(3P)  | 79(9)   | 159(11) | 107(8)  | -7(9)   | 19(7)   | -12(9)  |
| C(4P)  | 133(10) | 142(8)  | 120(9)  | 6(7)    | 11(8)   | -16(8)  |
| C(5P)  | 49(5)   | 129(11) | 114(9)  | -21(9)  | -10(6)  | -20(7)  |
| C(6P)  | 71(5)   | 118(8)  | 101(8)  | -5(7)   | 0(6)    | 4(6)    |
| P(2)   | 63(2)   | 83(2)   | 73(2)   | -11(2)  | -5(2)   | -10(2)  |
| C(7P)  | 73(6)   | 99(10)  | 83(9)   | -18(6)  | 7(6)    | -6(6)   |
| C(8P)  | 89(7)   | 106(8)  | 94(7)   | -20(6)  | 10(6)   | 1(6)    |
| C(9P)  | 69(7)   | 79(6)   | 92(8)   | -15(5)  | -6(6)   | -10(6)  |
| C(10P) | 95(8)   | 103(7)  | 105(8)  | -2(6)   | -14(6)  | 2(7)    |
| C(11P) | 73(7)   | 91(8)   | 83(7)   | -5(6)   | -7(6)   | -13(7)  |
| C(12P) | 85(7)   | 89(6)   | 76(6)   | -6(5)   | 3(6)    | -8(6)   |
| P(3)   | 162(4)  | 79(2)   | 90(3)   | -9(2)   | -51(3)  | 8(3)    |
| C(13P) | 196(13) | 181(17) | 75(8)   | -5(8)   | -33(8)  | -35(14) |
| C(14P) | 187(9)  | 210(13) | 201(13) | 6(9)    | -7(8)   | -15(9)  |
| C(15P) | 198(17) | 93(9)   | 97(10)  | -15(7)  | -45(11) | 37(11)  |
| C(16P) | 147(10) | 102(7)  | 123(9)  | -11(7)  | 5(8)    | 12(7)   |
| C(17P) | 168(11) | 92(11)  | 111(10) | -24(8)  | -50(8)  | -17(9)  |
| P(4)   | 178(5)  | 95(3)   | 136(4)  | -9(3)   | -96(4)  | 31(3)   |
| C(19P) | 155(15) | 209(17) | 210(17) | -10(15) | -57(11) | 66(9)   |
| C(18P) | 164(10) | 170(11) | 159(11) | 8(9)    | -7(8)   | -3(8)   |
| C(20P) | 240(13) | 245(15) | 245(14) | 12(10)  | -12(9)  | 16(9)   |
| C(21P) | 242(19) | 118(12) | 200(20) | 55(11)  | -49(13) | 23(11)  |
| C(22P) | 257(13) | 250(15) | 251(15) | 10(10)  | -6(9)   | 0(9)    |
| C(23P) | 220(20) | 204(16) | 106(9)  | 45(10)  | -85(12) | 15(15)  |
| C(24P) | 166(11) | 153(11) | 136(9)  | 21(8)   | -37(8)  | 18(8)   |

|        |         |         |         |         |         |         |
|--------|---------|---------|---------|---------|---------|---------|
| P(5)   | 86(3)   | 147(4)  | 119(4)  | -19(3)  | 35(2)   | 20(3)   |
| C(25P) | 131(13) | 149(12) | 189(18) | -24(9)  | 52(12)  | 41(11)  |
| C(26P) | 180(12) | 179(10) | 195(12) | 15(8)   | 7(9)    | 12(9)   |
| C(27P) | 133(11) | 121(13) | 129(12) | -37(10) | 17(9)   | -8(9)   |
| C(28P) | 167(11) | 168(11) | 133(8)  | -27(8)  | 20(8)   | 2(9)    |
| C(29P) | 124(13) | 173(15) | 165(14) | -5(11)  | 64(12)  | 4(10)   |
| C(30P) | 177(12) | 175(10) | 167(11) | 11(8)   | 2(9)    | -3(8)   |
| P(6)   | 72(3)   | 167(5)  | 255(8)  | -14(5)  | 1(4)    | -27(3)  |
| C(31P) | 210(20) | 240(20) | 243(17) | -56(15) | -96(15) | -33(14) |
| C(32P) | 210(11) | 215(11) | 221(11) | -15(7)  | -11(7)  | -23(7)  |
| C(33P) | 85(9)   | 315(19) | 230(20) | 42(14)  | 10(14)  | 61(14)  |
| C(34P) | 237(14) | 233(12) | 228(14) | 12(9)   | -5(9)   | 6(9)    |
| C(35P) | 152(17) | 211(17) | 320(20) | 10(17)  | 50(20)  | -57(10) |
| C(36P) | 216(13) | 205(11) | 208(13) | 5(9)    | 5(9)    | -16(9)  |
| P(1A)  | 108(3)  | 109(3)  | 104(3)  | 1(2)    | -12(2)  | -5(3)   |
| F(1A)  | 120(5)  | 184(8)  | 183(8)  | -10(7)  | 19(5)   | -24(6)  |
| F(2A)  | 145(6)  | 175(8)  | 179(8)  | 3(7)    | -32(6)  | -30(6)  |
| F(3A)  | 215(9)  | 185(8)  | 137(5)  | -8(6)   | 2(6)    | -2(7)   |

---

Table S5. Hydrogen coordinates ( $\times 10^4$ ) and isotropic displacement parameters ( $\text{\AA}^2 \times 10^{-3}$ ) for **3a**.

|        | x     | y     | z     | U(eq) |
|--------|-------|-------|-------|-------|
| —      |       |       |       |       |
| H(1A)  | -4667 | -4327 | -2715 | 87    |
| H(4B)  | -4277 | -3224 | -2336 | 88    |
| H(5B)  | -5046 | -4025 | -3248 | 91    |
| H(7A)  | -4684 | -2927 | -2851 | 87    |
| H(9A)  | -5560 | -3251 | -2627 | 81    |
| H(13A) | -6296 | -4402 | -2960 | 96    |
| H(14A) | -6004 | -4005 | -3495 | 103   |
| H(17A) | -3634 | -3767 | -2323 | 95    |
| H(18A) | -4230 | -4618 | -1356 | 101   |
| H(19A) | -4633 | -4303 | -1871 | 91    |
| H(20A) | -3269 | -4056 | -1776 | 87    |
| H(24A) | -4262 | -2524 | -5039 | 146   |
| H(26A) | -4897 | -1590 | -4616 | 130   |
| H(27A) | -5230 | -2017 | -4156 | 113   |
| H(29A) | -4639 | -2974 | -4615 | 138   |
| H(31A) | -4344 | -3524 | -3783 | 97    |
| H(32A) | -4562 | -2310 | -3632 | 106   |
| H(33A) | -3845 | -2194 | -3613 | 98    |
| H(34A) | -3651 | -3408 | -3700 | 95    |
| H(38A) | -6965 | -3773 | -4084 | 111   |
| H(39A) | -6268 | -3703 | -4106 | 107   |
| H(40A) | -7073 | -2753 | -3386 | 102   |
| H(43A) | -5793 | -4232 | -1720 | 89    |
| H(44A) | -6744 | -4555 | -2443 | 106   |
| H(45A) | -7471 | -3919 | -3458 | 116   |
| H(46A) | -8195 | -4012 | -3372 | 126   |
| H(47A) | -8403 | -2919 | -3805 | 117   |
| H(48A) | -2530 | -2111 | -3933 | 101   |
| H(50A) | -3135 | -3165 | -3205 | 88    |
| H(51A) | -6619 | -1843 | -6307 | 93    |
| H(52A) | -7527 | -1853 | -5517 | 104   |

|        |       |       |       |     |
|--------|-------|-------|-------|-----|
| H(53)  | -6154 | -2053 | -5795 | 101 |
| H(56A) | -6060 | -4637 | -1194 | 94  |
| H(57A) | -6364 | -2671 | -3405 | 101 |
| H(58A) | -7741 | -2781 | -3938 | 111 |
| H(59A) | -2421 | -3038 | -3162 | 96  |
| H(61)  | -3856 | -1744 | -4918 | 147 |
| H(62A) | -5684 | -3031 | -4858 | 115 |
| H(63A) | -6118 | -2230 | -4000 | 108 |
| H(64A) | -7109 | -2059 | -4969 | 102 |
| H(65A) | -6034 | -2690 | -5380 | 111 |
| H(66A) | -5793 | -3665 | -2096 | 76  |
| H(67A) | -3242 | -2230 | -4000 | 102 |
| H(68A) | -6972 | -4955 | -1900 | 99  |
| H(69A) | -6529 | -1934 | -4511 | 106 |
| H(70A) | -4504 | -1282 | -6097 | 190 |
| H(71A) | -4847 | -1622 | -5533 | 195 |
| H(72A) | -3496 | -1396 | -5451 | 147 |
| H(1PA) | -1081 | -3126 | -3911 | 143 |
| H(1PB) | -646  | -2988 | -3744 | 143 |
| H(2PA) | -892  | -3526 | -3339 | 184 |
| H(2PB) | -1285 | -3267 | -3218 | 184 |
| H(2PC) | -849  | -3131 | -3051 | 184 |
| H(3PA) | -703  | -2198 | -4144 | 138 |
| H(3PB) | -1086 | -2409 | -4356 | 138 |
| H(4PA) | -1123 | -1711 | -4469 | 198 |
| H(4PB) | -1098 | -1624 | -3977 | 198 |
| H(4PC) | -1491 | -1838 | -4170 | 198 |
| H(5PA) | -866  | -1954 | -3241 | 117 |
| H(5PB) | -844  | -2364 | -2977 | 117 |
| H(6PA) | -191  | -2133 | -3125 | 145 |
| H(6PB) | -284  | -2149 | -3617 | 145 |
| H(6PC) | -262  | -2560 | -3352 | 145 |
| H(7PA) | -2550 | -1911 | -3062 | 102 |
| H(7PB) | -2489 | -2275 | -2737 | 102 |
| H(8PA) | -2731 | -1709 | -2376 | 145 |
| H(8PB) | -2362 | -1439 | -2545 | 145 |
| H(8PC) | -2278 | -1799 | -2220 | 145 |
| H(9PA) | -1728 | -1381 | -2860 | 96  |

|        |       |       |       |     |
|--------|-------|-------|-------|-----|
| H(9PB) | -1435 | -1543 | -3221 | 96  |
| H(10A) | -1883 | -1059 | -3494 | 151 |
| H(10B) | -2263 | -1328 | -3351 | 151 |
| H(10C) | -1967 | -1488 | -3712 | 151 |
| H(11A) | -1285 | -2192 | -2595 | 99  |
| H(11B) | -1639 | -2015 | -2304 | 99  |
| H(12A) | -1528 | -2712 | -2146 | 125 |
| H(12B) | -1626 | -2831 | -2621 | 125 |
| H(12C) | -1977 | -2654 | -2327 | 125 |
| H(13B) | -3531 | -4451 | -63   | 181 |
| H(13C) | -3648 | -3982 | -23   | 181 |
| H(14B) | -4246 | -4375 | -49   | 299 |
| H(14C) | -4112 | -4564 | -490  | 299 |
| H(14D) | -4227 | -4094 | -457  | 299 |
| H(15A) | -3441 | -3579 | -1146 | 155 |
| H(15B) | -3867 | -3784 | -1043 | 155 |
| H(16A) | -3874 | -3121 | -813  | 186 |
| H(16B) | -3479 | -3196 | -533  | 186 |
| H(16C) | -3897 | -3411 | -412  | 186 |
| H(17B) | -2940 | -3691 | -278  | 148 |
| H(17C) | -2727 | -4123 | -350  | 148 |
| H(19B) | -2457 | -5545 | -873  | 230 |
| H(19C) | -2726 | -5425 | -1279 | 230 |
| H(18B) | -2404 | -3618 | -764  | 247 |
| H(18C) | -2825 | -3526 | -994  | 247 |
| H(18D) | -2605 | -3954 | -1060 | 247 |
| H(20B) | -2095 | -5030 | -1275 | 365 |
| H(20C) | -2221 | -4848 | -829  | 365 |
| H(20D) | -2480 | -4736 | -1237 | 365 |
| H(21A) | -3297 | -5686 | -792  | 226 |
| H(21B) | -3035 | -5707 | -370  | 226 |
| H(22A) | -3734 | -5700 | -201  | 379 |
| H(22B) | -3789 | -5280 | -446  | 379 |
| H(22C) | -3527 | -5296 | -24   | 379 |
| H(23A) | -2675 | -4704 | -142  | 211 |
| H(23B) | -3124 | -4840 | -19   | 211 |
| H(24B) | -2675 | -5160 | 428   | 227 |
| H(24C) | -2424 | -5341 | 43    | 227 |

|        |        |       |       |     |
|--------|--------|-------|-------|-----|
| H(24D) | -2873  | -5501 | 136   | 227 |
| H(25A) | -9706  | -2944 | -3237 | 188 |
| H(25B) | -9463  | -2741 | -2859 | 188 |
| H(26B) | -9456  | -2319 | -3459 | 277 |
| H(26C) | -9226  | -2665 | -3717 | 277 |
| H(26D) | -9004  | -2445 | -3333 | 277 |
| H(27B) | -8494  | -3335 | -2790 | 154 |
| H(27C) | -8565  | -2905 | -3009 | 154 |
| H(28A) | -8514  | -2830 | -2278 | 234 |
| H(28B) | -8895  | -3123 | -2213 | 234 |
| H(28C) | -8955  | -2690 | -2431 | 234 |
| H(29B) | -9460  | -3412 | -2456 | 185 |
| H(29C) | -9665  | -3683 | -2813 | 185 |
| H(30A) | -9331  | -4118 | -2338 | 260 |
| H(30B) | -8914  | -3877 | -2400 | 260 |
| H(30C) | -9096  | -4141 | -2776 | 260 |
| H(31B) | -9556  | -4084 | -4521 | 276 |
| H(31C) | -9344  | -4426 | -4241 | 276 |
| H(32B) | -9971  | -4660 | -4550 | 323 |
| H(32C) | -10210 | -4331 | -4277 | 323 |
| H(32D) | -9978  | -4696 | -4050 | 323 |
| H(33B) | -10235 | -3638 | -3793 | 254 |
| H(33C) | -9930  | -3390 | -3489 | 254 |
| H(34B) | -9944  | -2993 | -4102 | 348 |
| H(34C) | -9921  | -3386 | -4395 | 348 |
| H(34D) | -9529  | -3243 | -4139 | 348 |
| H(35A) | -9793  | -4156 | -3166 | 273 |
| H(35B) | -10065 | -4355 | -3528 | 273 |
| H(36A) | -9621  | -4853 | -3248 | 314 |
| H(36B) | -9238  | -4576 | -3363 | 314 |
| H(36C) | -9506  | -4773 | -3728 | 314 |

---

## Pulsed Field Gradient Spin Echo NMR Measurements of Truncated Tetrahedra **3a** and **3b**:

Pulsed gradient spin-echo (PGSE) NMR diffusion measurements were done by pulse-sequence developed by Stejskal and Tanner.<sup>3</sup>

$$\ln(I/I_0) = -\gamma_X^2 \delta^2 G^2 (\Delta - \delta/3) D \quad (1)$$

$\gamma_X$  = gyromagnetic ratio of the X nucleus;  
 $\delta$  = length of the gradient pulse;  $G$  = gradient strength;  
 $\Delta$  = delay between the midpoints of the gradients;  
 $D$  = diffusion coefficient

**Temp:** 298K

**Instrument:** Inova 500 MHz

**Stokes-Einstein Equation:** The molecular size is obtained from the diffusion coefficient via the Stokes-Einstein equation where  $k_B$  is the Boltzmann constant,  $T$  is the absolute temperature and  $r_H$  is the hydrodynamic radius of the species under investigation.

$$D = \frac{k_B T}{6\pi \eta r}$$

**Gradient Calibration:** The gradient strengths need to be carefully calibrated to obtain accurate  $D$  values to fit equation 1. Gradient strengths were calibrated using the width (in Hz) of a sample of known length along the NMR-tube ( $Z$ ) axis, back-calculation of the coil constant from a diffusion experiment on  $D_2O$  using  $D = 1.9 \times 10^{-5} \text{ cm}^2/\text{s}$  for  $D_2O$  at 298K<sup>4</sup> was used to calculate the gradient strengths of both the probes.

**Issue of Viscosity:** The effect of variable viscosity in different batch of same solvents was examined using the  $D$  values observed for the residual protons of the solvent resonance.

**Pulse sequence:** Stejskal-Tanner pulse sequence

Diffusion Coefficients for **3a** and **3b** in Acetone- $d_6$ :

$$D(\mathbf{3a}) = 4.27 (\pm 0.095) \times 10^{-6} \text{ cm}^2/\text{s}$$

$$D(\mathbf{3b}) = 4.41 (\pm 0.068) \times 10^{-6} \text{ cm}^2/\text{s}$$



**Encapsulated Complex 3b•4<sub>3</sub>.** 90° organoplatinum acceptor **1b** (4.36 mg, 5.53 mmol), hexapyridyl donor **2** (1.83 mg, 1.84 mmol), and 1,3,5-triphenylbenzene **4** (3.31 mg, 10.8 mmol) were placed in a 2-dram vial followed by addition of 1.0 mL D<sub>2</sub>O/Acetone-*d*<sub>6</sub> (v/v 1/1) solvent. The mixture was stirred at 80 °C for 16 h, and the encapsulated complex **3b•4<sub>3</sub>** was formed. Excess **4** was filtered. The OTf<sup>-</sup> counterions were exchanged for PF<sub>6</sub><sup>-</sup> using an aqueous solution of KPF<sub>6</sub> to precipitate the product, which was collected and washed with excess water and then dried in vacuum. Yield: 95 %. <sup>1</sup>H NMR (D<sub>2</sub>O/Acetone-*d*<sub>6</sub>: 1/1, 300 MHz): δ 8.76 (s, 48H, H<sub>α-Py</sub>), 7.36 (s, 48H, H<sub>β-Py</sub>), 6.94 (m, 105H, PhH<sub>3b and 4</sub>), 6.35 (m, 45H, PhH<sub>4</sub>), 1.63 (d, J = 4.2 Hz, 216H, PCH<sub>3</sub>). <sup>31</sup>P{<sup>1</sup>H} NMR (D<sub>2</sub>O/Acetone-*d*<sub>6</sub>: 1/1, 121.4 MHz): δ -28.2 (s, <sup>1</sup>J<sub>Pt-P</sub> = 3111 Hz). Anal. Calcd for C<sub>432</sub>H<sub>462</sub>F<sub>144</sub>N<sub>24</sub>P<sub>48</sub>Pt<sub>12</sub>: C, 41.33; H, 3.71; N, 2.68. Found: C, 40.95; H, 3.63; N, 2.83.

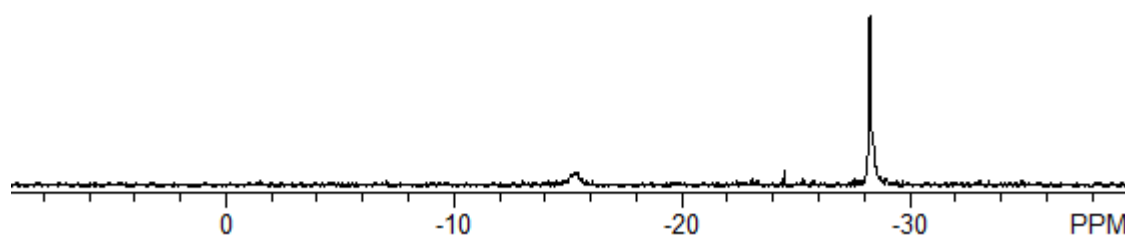

Figure S5. <sup>31</sup>P{<sup>1</sup>H} NMR (300MHz) spectra of the encapsulated complex **3b•4<sub>3</sub>**.

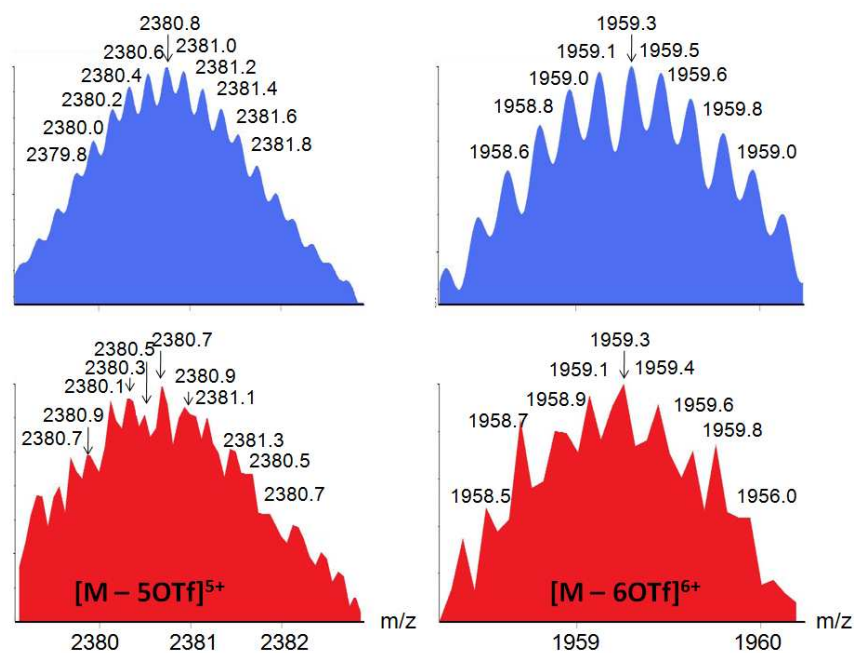

Figure S6. Calculated (top) and Experimental (bottom) ESI mass spectra of the encapsulated complex **3b•4<sub>3</sub>**.

Reference:

1. Stang, P. J.; Cao, D. H.; Saito, S.; Arif, A. M. *J. Am. Chem. Soc.* **1995**, *117*, 6273.
2. (a) Rathore, R.; Burns, C. L.; Guzei, I. A. *J. Org. Chem.* **2004**, *69*, 1524. (b) Hoffmann, M.; Kärnbratt, J.; Chuan, M. H.; Herz, L. M.; Albinsson, B.; Anderson, H. L. *Angew. Chem., Int. Ed.* **2008**, *47*, 4993.
3. Stejskal, E. O.; Tanner, J. E. *J. Chem. Phys.* **1965**, *42*, 288.
4. Longworth, L. G. *J. Phys. Chem.* **1960**, *64*, 1914.
